# Supplementary material for: A systematic review of epidemiological modelling in response to lumpy skin disease outbreaks
Source: Front Vet Sci. 2024 Sep 23;11:1459293. doi: 10.3389/fvets.2024.1459293 (PMC11456570; doi:10.3389/fvets.2024.1459293)
Supplement: Supplementary file 2 [file Table_1.xlsx]

## Sheet: Eligible literature
Author and Year	Analysis type	Categories	Answer	Required data	Region of outbreak data1	Period of outbreak data2	DOI3
Abdelgawad 2017	Risk factor analysis	Generalised linear mixed modelling	Relationship between LSD outbreak and meteorological factors	LSD outbreak, risk factor data	Egypt	Jan 2015 - Dec 2015	10.5281/zenodo.1129702
Abera Z et al. 2015	Descriptive epidemiology	Basic statistics	The outbreak severity	LSD outbreak data	Ethiopia	Oct 2012 - May 2013	10.1186/s12917-015-0432-7
	Risk factor analysis	Measures of association	Possibility of LSD seropositivity according to the risk factors (cattle phenotype and regions)	LSD outbreak, risk factor data
Afshari Safavi E 2022	Descriptive epidemiology	Epidemic curve, outbreak mapping	Spatio-temporal distribution of LSD outbreak	LSD outbreak, time, and location data	Worldwide	2011 - 2021	10.1007/s11250-022-03073-2
	Risk factor analysis	Machine learning algorithms	Relationship between LSD outbreak and topographic and meteorological factors	LSD outbreak, risk factor data
Alemayehu G et al. 2015	Descriptive epidemiology	Basic statistics	The outbreak severity	LSD outbreak data	Ethiopia	Jun 2011 - Dec 2011	10.5897/JVMAH2014
	Risk factor analysis	Measures of association	Possibility of morbidity and mortality according to the risk factors (farm environment and regions)	Basic statistics, risk factor data
Alkhamis MA & VanderWaal K 2016	Descriptive epidemiology	Epidemic curve	Temporal distribution of LSD outbreak	LSD outbreak, time data	Middle-East countries	Jul 2012 - May 2015	10.3389/fvets.2016.00019
	Spatiotemporal analysis	Ecological niche modelling	Identify the areas with proper environmental factors for LSD outbreak	LSD outbreak, risk factor, and geographical data
	Transmission modelling	R0	Transmission potential of LSD outbreak	LSD outbreak, transmission, and population data
Allepuz A et al. 2019	Descriptive epidemiology	Basic statistics	The outbreak severity	LSD outbreak data	Worldwide	Jul 2012 - Dec 2018	10.1111/tbed.13090
		Epidemic curve, outbreak mapping	Temporal distribution of LSD outbreak	LSD outbreak, time data
	Risk factor analysis	Hierarchical Bayesian modelling	Possibility of LSD outbreak according to the risk factors (cattle phenotype, topographic and meteorological factors)	LSD outbreak, risk factor data
	Spatiotemporal analysis	Ecological niche modelling	Identify the areas with proper environmental factors for LSD outbreak	LSD outbreak, risk factor, and geographical data
Anwar A et al. 2022	Descriptive epidemiology	Epidemic curve	Temporal distribution of LSD outbreak	LSD outbreak, time data	Worldwide	Jan 2015 - Jan 2022	10.3390/v14102203
	Spatiotemporal analysis	Time-series modelling	Tracking and estimating changes in the number of outbreaks over time considering autocorrelation	LSD outbreak data, time data
Ardestani EG & Mokhtari A 2020	Descriptive epidemiology	Epidemic curve	Temporal distribution of LSD outbreak	LSD outbreak, time data	Iran	2012-2016	10.1016/j.prevetmed.2020.104887
	Spatiotemporal analysis	Ecological niche modelling	Identify the areas with proper environmental factors for LSD outbreak	LSD outbreak, risk factor, and geographical data
Arjkumpa O et al. 2021	Descriptive epidemiology	Basic statistics	The outbreak severity	LSD outbreak data	Thailand	Mar - Apr 2021	10.3389/fvets.2021.799065
		Epidemic curve, outbreak mapping	Spatio-temporal distribution of LSD outbreak	LSD outbreak, time, and location data
	Spatiotemporal analysis	Spatiotemporal cluster analysis	Identifying oubreak groups based on similarities in outbreak characteristics.	LSD outbreak, time, and location data
Badhy SC et al. 2021	Descriptive epidemiology	Basic statistics	The outbreak severity	LSD outbreak data	Bangladesh	Jun 2019 - Sep 2019	10.1186/s12917-021-02751-x
	Transmission modelling	Phylogenetic analyses	The origin of outbroken LSD strain	Genomic sequences
Bouchemla F et al. 2018	Descriptive epidemiology	Outbreak mapping	Spatial distribution of LSD outbreak	LSD outbreak, location data	Worldwide	2016 - 2017	10.14202/vetworld.2018.1229-1236
Byadovskaya O et al. 2022	Descriptive epidemiology	Basic statistics	The outbreak severity	LSD outbreak data	Russia	2015 - 2020	10.1111/tbed.14599
		Epidemic curve, outbreak mapping	Spatio-temporal distribution of LSD outbreak	LSD outbreak, time, and location data
	Spatiotemporal analysis	Spatiotemporal cluster analysis	Identifying oubreak groups based on similarities in outbreak characteristics.	LSD outbreak, time, and location data
Casal J et al. 2019	Simulation modelling	Scenario modelling (ABM, EBM, or hybrid modelling)	Estimate the size of the vaccine bank needed to control LSD, scenario simulation	Various parameters	NA*	NA*	10.1371/journal.pone.0210317
Diab HM et al. 2021	Descriptive epidemiology	Basic statistics	The outbreak severity	LSD outbreak data	Egypt	May - Jul 2019	10.17582/journal.jahp/2021/9.4.406.416
	Transmission modelling	Phylogenetic analyses	The origin of outbroken LSD strain	Genomic sequences
EFSA 2017	Descriptive epidemiology	Basic statistics	The outbreak severity	LSD outbreak data	Southern Europe	2014 - 2016	10.2903/j.efsa.2017.4773
		Epidemic curve, outbreak mapping	Spatio-temporal distribution of LSD outbreak	LSD outbreak, time, and location data
	Transmission modelling	Spatial kernel-based transmission rate	The spread distance and speed	LSD outbreak, time, and location data
		Transmission network modelling	Following spread history from farm to farm	LSD outbreak, time, and location data
EFSA 2018	Descriptive epidemiology	Basic statistics	The outbreak severity	LSD outbreak data	Southern Europe	2016 - 2017	10.2903/j.efsa.2018.5176
		Epidemic curve, outbreak mapping	Spatio-temporal distribution of LSD outbreak	LSD outbreak, time, and location data
	Transmission modelling	Spatial kernel-based transmission rate	The spread distance and speed	LSD outbreak, time, and location data
EFSA et al. 2018	Transmission modelling	Spatial kernel-based transmission rate	The spread distance and speed	LSD outbreak, time, and location data	Albania, Bulgaria, Greece	2017 - 2018	10.2903/j.efsa.2018.5452
	Simulation modelling	Scenario modelling (ABM, EBM, or hybrid modelling)	Prediction of LSD eradication according to the different vaccine coverages and durations.	LSD outbreak, demographic, scenario data
EFSA et al. 2019	Descriptive epidemiology	Epidemic curve, outbreak mapping	Spatio-temporal distribution of LSD outbreak	LSD outbreak, time, and location data	Southern Europe, Middle-East, Asia	2018	10.2903/j.efsa.2019.5638
	Transmission modelling	R0	Transmission potential of LSD outbreak	LSD outbreak, transmission, and population data
EFSA et al. 2020	Descriptive epidemiology	Basic statistics	The outbreak severity	LSD outbreak data	Southern Europe, Middle-East, Asia	2019	10.2903/j.efsa.2020.6010
		Epidemic curve, outbreak mapping	Spatio-temporal distribution of LSD outbreak	LSD outbreak, time, and location data
	Risk factor analysis	Generalised linear mixed modelling	Relationship between LSD seropositivity and the number of vaccination	Basic statistics, risk factor data
	Transmission modelling	Dynamic transmission modelling	The dynamics of population (SIR model)	LSD outbreak, transmission, and population data
EFSA AHAW Panel 2015	Descriptive epidemiology	Epidemic curve, outbreak mapping	Spatio-temporal distribution of LSD outbreak	LSD outbreak, time, and location data	Middle-East countries	1989 - 2014	10.2903/j.efsa.2015.3986
	Transmission modelling	Spatial kernel-based transmission rate	The spread distance and speed	LSD outbreak, time, and location data
	Simulation modelling	Scenario modelling (ABM, EBM, or hybrid modelling)	Prediction of LSD spread according to the culling timing.	LSD outbreak, demographic, spatial-kernel, scenario parameter data
EFSA AHAW Panel 2016	Descriptive epidemiology	Basic statistics	The outbreak severity	LSD outbreak data	Greece, Bulgaria	2015 - 2016	10.2903/j.efsa.2016.4573
		Epidemic curve, outbreak mapping	Spatio-temporal distribution of LSD outbreak	LSD outbreak, time, and location data
	Transmission modelling	Spatial kernel-based transmission rate	The spread distance and speed	LSD outbreak, time, and location data
	Simulation modelling	Scenario modelling (ABM, EBM, or hybrid modelling)	Prediction of LSD spread according to the different vaccination and stamping-out strategies	LSD outbreak, demographic, spatial-kernel, scenario parameter data
El-Ansary RE et al. 2022	Transmission modelling	Phylogenetic analyses	The origin of outbroken LSD strain	Genomic sequences	Egypt	2018 - 2019	10.1186/s12917-022-03398-y
Farra D et al. 2022	Risk factor analysis	Quantitative risk assessment	Risk assessment of LSD entry pathway	Various parameters	Ukraine*	NA*	10.1016/j.mran.2021.100200
Gari G et al. 2010	Descriptive epidemiology	Basic statistics	The outbreak severity	LSD outbreak data	Ethiopia	Apr 2007 - Jul 2008	10.1017/S0950268810000506
	Risk factor analysis	Measures of association	Possibility of LSD outbreak according to the risk factors (farm environment and regions)	LSD outbreak, risk factor data
Gari G et al. 2012	Risk factor analysis	Generalised linear mixed modelling	contribution of risk factors to LSD outbreak (regions, husbandary)	LSD outbreak, risk factor data	Ethiopia	Apr 2007 - Aug 2008	10.1016/j.actatropica.2012.04.009
Gubbins S 2019	Transmission modelling	R0	Transmission potential of LSD outbreak	Vector life history data	NA*	NA*	10.1111/tbed.13216
Gubbins S et al. 2020	Descriptive epidemiology	Epidemic curve, outbreak mapping	Spatio-temporal distribution of LSD outbreak	LSD outbreak, time, and location data	Albania	2016	10.1016/j.prevetmed.2018.12.008
	Transmission modelling	Spatial kernel-based transmission rate	The spread distance and speed	LSD outbreak, time, and location data
Hall R et al. 2022	Risk factor analysis	Quantitative risk assessment	Risk assessment of LSD entry pathway	Various parameters	Australia*	NA*	NA*
	Simulation modelling	Airborne dispersal and trajectory modelling	Estimated the vector dispersion	Climate and other parameters
Hasib FMY et al. 2021	Descriptive epidemiology	Basic statistics	The outbreak severity	LSD outbreak data	Bangladesh	Aug - Dec 2019	10.1002/vms3.524
		Outbreak mapping	Spatial distribution of LSD outbreak	LSD outbreak, location data
	Risk factor analysis	Measures of association	Possibility of LSD outbreak according to the risk factors (cattle phenotype and farm environment)	LSD outbreak, risk factor data
		Generalised linear mixed modelling	contribution of risk factors to LSD outbreak	LSD outbreak, risk factor data
	Transmission modelling	Phylogenetic analyses	The origin of outbroken LSD strain	Genomic sequences
Hodhod A et al. 2020	Transmission modelling	Phylogenetic analyses	The origin of outbroken LSD strain	Genomic sequences	Egypt	Apr 2017 - Sep 2018	NA*
Kahana-Sutin E et al. 2017	Descriptive epidemiology	Basic statistics	The outbreak severity	LSD outbreak data	Israel	2012 - 2013	10.1111/mve.12217
		Epidemic curve, outbreak mapping	Spatio-temporal distribution of LSD outbreak	LSD outbreak, time, and location data
	Risk factor analysis	Generalised linear mixed modelling	Relationship between vector abundance and meteorological factors	Vector abundance, risk factor data
Kiplagat SK et al. 2020	Risk factor analysis	Generalised linear mixed modelling	contribution of risk factors to LSD outbreak (cattle phenotype, farm environment, and vaccination)	LSD outbreak, risk factor data	Kenya	Sep 2016 - Oct 2017	10.3389/fvets.2020.00259
Klausner Z et al. 2017	Simulation modelling	Airborne dispersal and trajectory modelling	Estimated the vector dispersion	Climate and other parameters	Egypt*	NA*	10.1111/tbed.12378
Koirala P et al. 2022	Descriptive epidemiology	Basic statistics	The outbreak severity	LSD outbreak data	Nepal	Aug 2020 - Oct 2020	10.3390/microorganisms10030539
		Outbreak mapping	Spatial distribution of LSD outbreak	LSD outbreak, location data
	Transmission modelling	Phylogenetic analyses	The origin of outbroken LSD strain	Genomic sequences
Lu G et al. 2020	Descriptive epidemiology	Basic statistics	The outbreak severity	LSD outbreak data	China	2019	10.1111/tbed.13898
		Outbreak mapping	Spatial distribution of LSD outbreak	LSD outbreak, location data
Machado G et al. 2019	Descriptive epidemiology	Epidemic curve	Temporal distribution of LSD outbreak	LSD outbreak, time data	Southern Europe, Middle-East, Asia	2014 - 2016	10.1111/tbed.13253
	Spatiotemporal analysis	Ecological niche modelling	Identify the areas with proper environmental factors for LSD outbreak	LSD outbreak, risk factor, and geographical data
	Risk factor analysis	Hierarchical Bayesian modelling	Choose risk variables which met the ecological niche model and and calculating the relative risk due to those variables	Ecological niche model, risk factor data
Magori-Cohen R et al. 2012	Descriptive epidemiology	Basic statistics	The outbreak severity	LSD outbreak data	Israel	2006	10.1186/1297-9716-43-1
		Epidemic curve	Temporal distribution of LSD outbreak	LSD outbreak, time data
	Transmission modelling	Dynamic transmission modelling	Estimate the curve equation with parameters of past epidemic curve	Epidemic curve data
		R0	Transmission potential of LSD outbreak	LSD outbreak, transmission, and population data
Mat B et al. 2021	Descriptive epidemiology	Basic statistics	The outbreak severity	LSD outbreak data	Türkiye	2019	10.1186/s12917-021-02983-x
		Outbreak mapping	Spatial distribution of LSD outbreak	LSD outbreak, location data
	Transmission modelling	R0	Transmission potential of LSD outbreak	LSD outbreak, transmission, and population data
		Dynamic transmission modelling	The dynamics of population (SIR model)	LSD outbreak, transmission, and population data
Maw MT et al. 2022	Descriptive epidemiology	Basic statistics	The outbreak severity	LSD outbreak data	Myanmar	Mar 2021 - Jun 2021	10.3390/microorganisms10050897
		Outbreak mapping	Spatial distribution of LSD outbreak	LSD outbreak, location data
	Transmission modelling	Phylogenetic analyses	The origin of outbroken LSD strain	Genomic sequences
Mercier A et al. 2018	Descriptive epidemiology	Epidemic curve, outbreak mapping	Spatio-temporal distribution of LSD outbreak	LSD outbreak, time, and location data	Southern Europe	May 2015 - Aug 2016	10.1111/tbed.12624
	Transmission modelling	Spatial kernel-based transmission rate	The spread distance and speed	LSD outbreak, time, and location data
Molla W et al. 2017	Descriptive epidemiology	Basic statistics	The outbreak severity	LSD outbreak data	Ethiopia	Apr 2014 - Feb 2015	10.1017/S0950268817001637
		Epidemic curve	Temporal distribution of LSD outbreak	LSD outbreak, time data
	Transmission modelling	R0	Transmission potential of LSD outbreak	LSD outbreak, transmission, and population data
		Dynamic transmission modelling	The dynamics of population (SIR model)	LSD outbreak, transmission, and population data
	Risk factor analysis	Generalised linear mixed modelling	Parameter (transmission and survival rate) estimation from SIR model	SIR model
Molla W et al. 2018	Descriptive epidemiology	Basic statistics	The outbreak severity	LSD outbreak data	Ethiopia	Jan - May 2015	10.1016/j.prevetmed.2018.09.029
	Risk factor analysis	Measures of association	Possibility of LSD seropositivity according to the risk factors (farm environment, cattle phenotype and topotypic factor)	Basic statistics, risk factor data
		Generalised linear mixed modelling	contribution of risk factors to seropositivity	Basic statistics, risk factor data
Ochwo S et al. 2018	Descriptive epidemiology	Basic statistics	The outbreak severity	LSD outbreak data	Uganda	Jan 2002 - Dec 2016	10.1186/s12917-018-1503-3
		Epidemic curve, outbreak mapping	Spatio-temporal distribution of LSD outbreak	LSD outbreak, time, and location data
	Spatiotemporal analysis	Spatiotemporal cluster analysis	Identifying oubreak groups based on similarities in outbreak characteristics.	LSD outbreak, time, and location data
Ochwo S et al. 2019	Risk factor analysis	Generalised linear mixed modelling	Relationship between LSD seroprevalence and risk factors (farm environment, cattle phenotype, and regions)	Basic statistics, risk factor data	Uganda	Jul 2016 - Aug 2017	10.1186/s12917-019-1983-9
Punyapornwithaya V et al. 2022	Descriptive epidemiology	Basic statistics	The outbreak severity	LSD outbreak data	Thailand	May - Jul 2021	10.3389/fvets.2022.957306
		Epidemic curve, outbreak mapping	Spatio-temporal distribution of LSD outbreak	LSD outbreak, time, and location data
	Spatiotemporal analysis	Spatiotemporal cluster analysis	Identifying oubreak groups based on similarities in outbreak characteristics.	LSD outbreak, time, and location data
Saegerman C et al. 2018	Risk factor analysis	Quantitative risk assessment	Risk assessment of LSD entry pathway	Various parameters	France*	NA*	10.1371/journal.pone.0198506
Saegerman C et al. 2019	Risk factor analysis	Quantitative risk assessment	Risk assessment of LSD entry pathway	Various parameters	France*	NA*	10.1111/tbed.13111
Sanz-Bernardo B et al. 2021	Transmission modelling	R0	Transmission potential of LSD outbreak	Virus and vector life history data	NA*	NA*	10.1128/JVI.02239-20
Sariya L et al. 2022	Descriptive epidemiology	Basic statistics	The outbreak severity	LSD outbreak data	Thailand	Jun 2021 - Sep 2021	10.1111/tbed.14552
		Outbreak mapping	Spatial distribution of LSD outbreak	LSD outbreak, location data
	Transmission modelling	Phylogenetic analyses	The origin of outbroken LSD strain	Genomic sequences
Şevik M & Doğan M 2017	Descriptive epidemiology	Epidemic curve, outbreak mapping	Spatio-temporal distribution of LSD outbreak	LSD outbreak, time, and location data	Türkiye	Jul 2014 - Jun 2015	10.1111/tbed.12501
	Transmission modelling	Phylogenetic analyses	The origin of outbroken LSD strain	Genomic sequences
	Risk factor analysis	Generalised linear mixed modelling	Relationship between LSD outbreak and risk factors (farm environment, cattle phenotype, and regions)	LSD outbreak, risk factor data
Stojmanovski Z 2018	Descriptive epidemiology	Epidemic curve	Temporal distribution of LSD outbreak	LSD outbreak, time data	Southern Europe	Aug 2015 - Jul 2017	10.2298/VETGL171027003S
	Spatiotemporal analysis	Spatiotemporal cluster analysis	Identifying oubreak groups based on similarities in outbreak characteristics.	LSD outbreak, time, and location data
Sudhakar SB et al. 2020	Descriptive epidemiology	Basic statistics	The outbreak severity	LSD outbreak data	India	Aug 2019	10.1111/tbed.13579
		Outbreak mapping	Spatial distribution of LSD outbreak	LSD outbreak, location data
	Transmission modelling	Phylogenetic analyses	The origin of outbroken LSD strain	Genomic sequences
Suparyati S et al. 2022	Risk factor analysis	Machine learning algorithms	Relationship between LSD outbreak and topographic and meteorological factors	LSD outbreak, risk factor data	NA*	NA*	10.29207/resti.v6i4.4147
Susanti Tri et al. 2023	Descriptive epidemiology	Outbreak mapping	Spatial distribution of LSD outbreak	LSD outbreak, location data	Indonesia	Jan 2022 - Jun 2022	10.14202/vetworld.2023.2071-2079
	Risk factor analysis	Measures of association	Possibility of morbidity and mortality according to the risk factors (farm environment and regions)	Basic statistics, risk factor data
		Generalised linear mixed modelling	Relationship between LSD outbreak and meteorological factors	LSD outbreak, risk factor data
Suwankitwat N et al. 2022	Descriptive epidemiology	Basic statistics	The outbreak severity	LSD outbreak data	Thailand	Mar 2021 - Jun 2021	10.3390/vetsci9100542
		Outbreak mapping	Spatial distribution of LSD outbreak	LSD outbreak, location data
	Transmission modelling	Phylogenetic analyses	The origin of outbroken LSD strain	Genomic sequences
Swiswa S et al. 2017	Descriptive epidemiology	Outbreak mapping	Spatial distribution of LSD outbreak	LSD outbreak, location data	Zimbabwe	Jan 1995 - Dec 2014	10.1007/s11250-016-1180-9
Taylor RA et al. 2019	Risk factor analysis	Quantitative risk assessment	Risk assessment of LSD entry pathway	Various parameters	United Kingdom*	NA*	10.1111/tbed.12993
Tran HTT et al. 2021	Transmission modelling	Phylogenetic analyses	The origin of outbroken LSD strain	Genomic sequences	Vietnam	Nov 2020	10.1111/tbed.14022
Uddin MA et al. 2022	Descriptive epidemiology	Basic statistics	The outbreak severity	LSD outbreak data	Bangladesh	Dec 2019 - Dec 2020	10.1111/tbed.14696
	Risk factor analysis	Measures of association	Possibility of LSD outbreak according to the risk factors (farm environment and regions)	LSD outbreak, risk factor data
		Generalised linear mixed modelling	contribution of risk factors to LSD outbreak	LSD outbreak, risk factor data
Wang J et al. 2022	Transmission modelling	Phylogenetic analyses	The origin of outbroken LSD strain	Genomic sequences	China	Jun 2020	10.1111/tbed.14570
1 Quantitative risk assessments, simulation modelling, and experimental studies that do not use outbreak data are annotated as its country and NA, respectively.
2 Quantitative risk assessments, simulation modelings, and experimental studies that do not use outbreak data are annotated as NA.
3 If the DOI is not available, it is annotated as NA.
